# Supplementary material for: Water-catalyzed gas-phase hydrogen abstraction reactions of CH3O2 and HO2 with HO2: a computational investigation
Source: Royal Society of Chemistry journal article supplement (doi:10.1039/c1cp21563a), 2011-01-01
Supplement: c1cp21563a.pdf [file c1cp21563a.pdf]

## Supporting information

-for-

# Water-catalyzed gas-phase hydrogen abstraction reactions of $\text{CH}_3\text{O}_2$ and $\text{HO}_2$ with $\text{HO}_2$ : A computational investigation

Tianlei Zhang<sup>a</sup>, Wenliang Wang<sup>\*a</sup>, Pei Zhang<sup>a</sup>, Jian Lü<sup>b</sup>, Yue  
Zhang<sup>a</sup>

<sup>a</sup>Key Laboratory for Macromolecular Science of Shaanxi Province, School of Chemistry and  
Materials Science, Shaanxi Normal University, Xi'an, Shaanxi 710062, People's Republic of China

<sup>b</sup>Xi'an Modern Chemistry Research Institute, Xi'an 710065, People's Republic of China

---

\* Corresponding Author: wlwang Tel: +86-29-85308442 Fax: +86-29-85307774  
Email: e-mail: wlwang@snnu.edu.cn

### A. The scheme of possible reaction pathways for water-catalyzed reactions of $\text{CH}_3\text{O}_2$ and $\text{HO}_2$ with $\text{HO}_2$ along with the corresponding pathways without a water molecule

**Fig. S1** The scheme of possible pathways for  $\text{CH}_3\text{O}_2 + \text{HO}_2$  and  $\text{HO}_2 + \text{HO}_2$  reaction in the presence and absence of a water molecule (a) the reaction of  $\text{CH}_3\text{O}_2$  with  $\text{HO}_2$  in the presence and absence of a water molecule; (b) the reaction of  $\text{HO}_2$  with  $\text{HO}_2$  in the presence and absence of a water molecule. IMW, TSW and PW are the intermediates, transition states and products for the title reaction in the presence of a water molecule while IM, TS and P denote the intermediates, transition states and products without a water molecule; Channel aw-cw and channel aw'-cw' denote water-catalyzed reaction channels for  $\text{CH}_3\text{O}_2 + \text{HO}_2$  and  $\text{HO}_2 + \text{HO}_2$  reaction, respectively, while channel a-c, and channel a'-c' denote the corresponding channels without a water molecule for  $\text{CH}_3\text{O}_2 + \text{HO}_2$  and  $\text{HO}_2 + \text{HO}_2$  reaction, respectively.

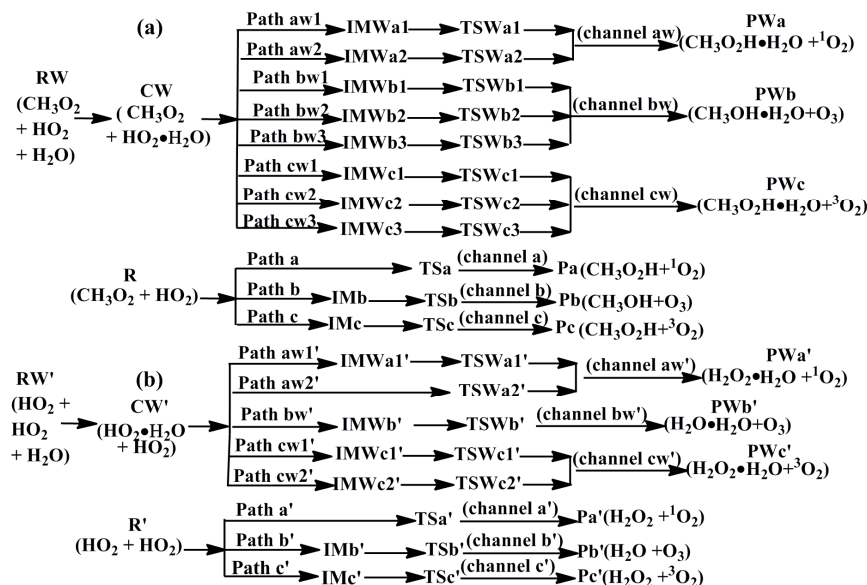

**Fig. S1**

25 **B. Data from calculations.**

**Fig. S2** Optimized geometries of all the species in the reaction of  $\text{CH}_3\text{O}_2 + \text{HO}_2$  with and without a water molecule. The distance (Å) and angle (°) with and without parentheses were the experimental data from the NIST chemistry webbook (<http://webbook.nist.gov/chemistry>) and values obtained at the B3LYP/6-311G(2d,2p) level, respectively.

30 **Fig. S3** The optimized geometrical structures for the species of the reactants ( $\text{HO}_2$ ,  $\text{H}_2\text{O}$ ) and products ( $\text{CH}_3\text{OH}$ ,  $^3\text{O}_2$ ,  $\text{O}_3$ ) at several different levels of theory. The values in parentheses are the experimental values. <sup>a</sup> The values obtained at the B3LYP/6-311G(2d,2p) level of theory; <sup>b</sup> The values obtained at the CCSD/6-311G(2d,2p) level of theory; <sup>c</sup> The values obtained at the MP2/6-311G(2d,2p) level of theory; <sup>d</sup> The values obtained at the MPW1PW91/6-311G(2d,2p) level of theory; <sup>e</sup> The values obtained at the MPW1K/6-311G(2d,2p) level of theory; bond length is in angstrom and angle is in degree.

40 **Fig. S4** Optimized geometries of all the species in the reaction of  $\text{HO}_2 + \text{HO}_2$  with and without a water molecule. The distance (Å) and angle (°) with and without parentheses were the experimental data from the NIST chemistry webbook (<http://webbook.nist.gov/chemistry>) and values obtained at the B3LYP/6-311G(2d,2p) level, respectively.

**Fig. S5** Schematic energy diagram for Path aw3 and aw4 that involves in Channel aw. Energies ( $\text{kcal}\cdot\text{mol}^{-1}$ ) computed at the CCSD(T)/6-311++G(3d,2p)/B3LYP/6-311G(2d,2p) level include zero-point energy correction. The distances (Å) were optimized at the B3LYP/6-311G(2d,2p) level.

45 **Table S1.** T1 diagnostic values for the species that involved in the title reactions of  $\text{CH}_3\text{O}_2 + \text{HO}_2$  and  $\text{HO}_2 + \text{HO}_2$ .

**Table S2** The electronic energies ( $E$ ), zero point energies (ZPE), total energies ( $E_T$ ) and relative energies ( $E_R$ ) of the reactants, intermediates, products and transition states for  $\text{CH}_3\text{O}_2 + \text{HO}_2$  reaction in the presence and absence of a water molecule.

50 **Table S3(a)** The electronic energies ( $E$ ), zero point energies (ZPE), total energies ( $E_T$ ) and relative energies ( $E_R$ ) of the reactants, intermediates, products and transition states for  $\text{HO}_2 + \text{HO}_2$  reaction in the presence and absence of a water molecule.

**Table S3(b)** Relative energy ( $\Delta E$ ,  $\text{kcal}\cdot\text{mol}^{-1}$ ) of water-catalyzed transition states and intermediates to the corresponding ones without a water molecule in  $\text{HO}_2 + \text{HO}_2$  reaction

55 **Table S4** Vibrational frequencies (in  $\text{cm}^{-1}$ ) for the optimized geometries at B3LYP/6-311G(2d,2p) level of theory for  $\text{CH}_3\text{O}_2 + \text{HO}_2$  reaction in the presence and absence of a water molecule.

**Table S5** Vibrational frequencies (in  $\text{cm}^{-1}$ ) for the optimized geometries at B3LYP/6-311G(2d,2p) level of theory for  $\text{HO}_2 + \text{HO}_2$  reaction in the presence and absence of a water molecule

60 **Table S6** The calculated CVT/SCT rate constants for Path a and Path c' along with the available experimental and theoretical values.

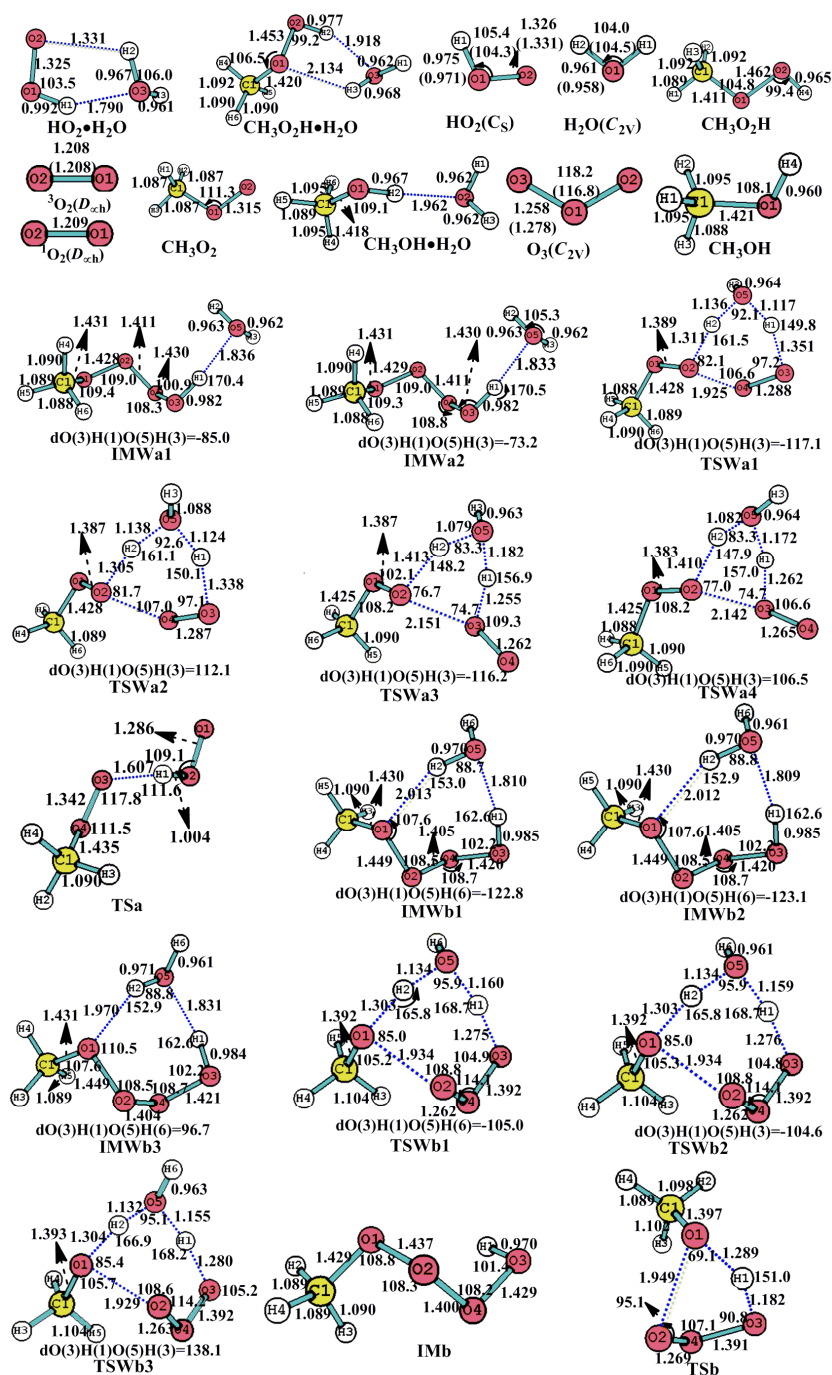

Fig. S2 to be Continued

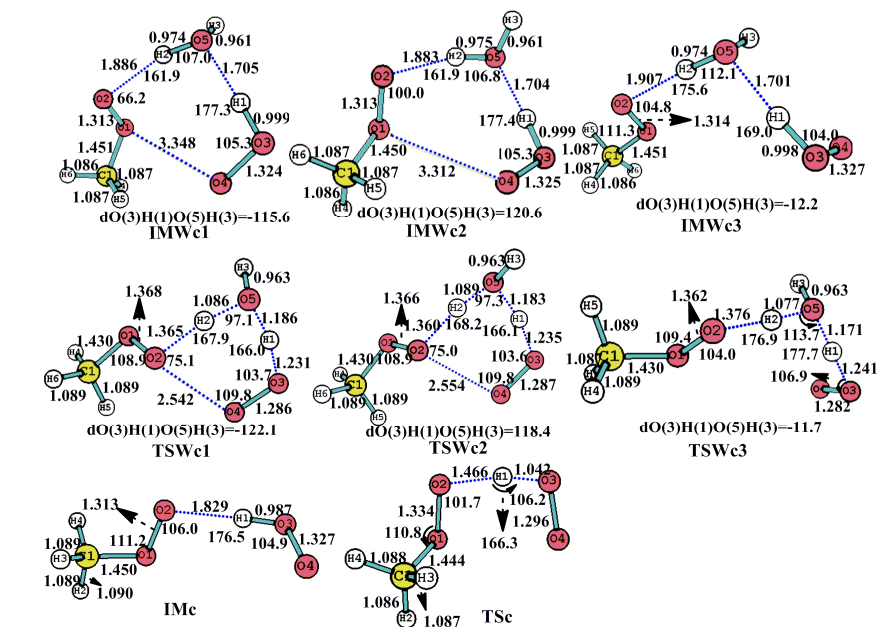

65

Fig. S2

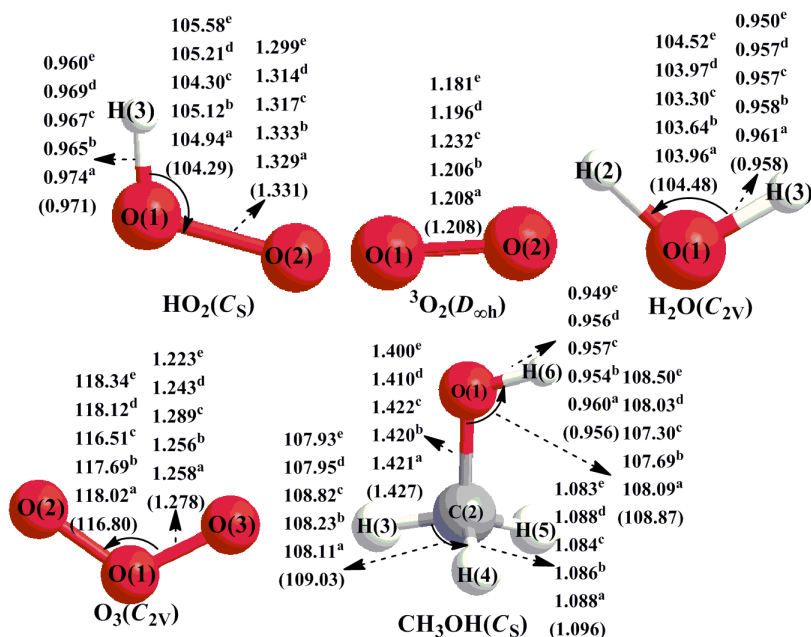

Fig. S3

For the reactants ( $\text{HO}_2$ ,  $\text{H}_2\text{O}$ ) and products ( ${}^3\text{O}_2$ ,  $\text{O}_3$ ,  $\text{CH}_3\text{OH}$ ), the average  
 70 absolute deviations between the calculated bond lengths, angles at the B3LYP/6-  
 311G(2d,2p), CCSD/6-311G(2d,2p), MP2/6-311G(2d,2p), MPW1PW91/6-311G  
 (2d,2p), MPW1K/6-311G(2d,2p), levels of theory and the experimental ones are  
 0.59%, 0.43%, 0.77%, 0.88%, and 1.44%, respectively. It is obvious that the  
 calculated geometrical parameters of the reactants and products for the reaction from  
 75 the B3LYP/6-311G(2d,2p), CCSD/6-311G(2d,2p), MP2/6-311G(2d,2p) and  
 MPW1PW91/6-311G(2d,2p) methods are more accurate than those from MPW1K/6-  
 311G (2d,2p) method. The calculated geometrical parameters from the B3LYP/6-  
 311G(2d,2p) method are close to those from CCSD/6-311G(2d,2p) method and are  
 in good agreement with the corresponding experimental values. The largest  
 80 deviations of bond lengths and bond angles at the B3LYP/6-311G(2d,2p) were  
 0.02Å (O-O bond in  $\text{O}_3$ ) and 1.22° (angle  $\angle\text{O-O-O}$  in  $\text{O}_3$ ). So the calculated bond  
 lengths and angles at the B3LYP/6-311G(2d,2p) level of theory are acceptable.

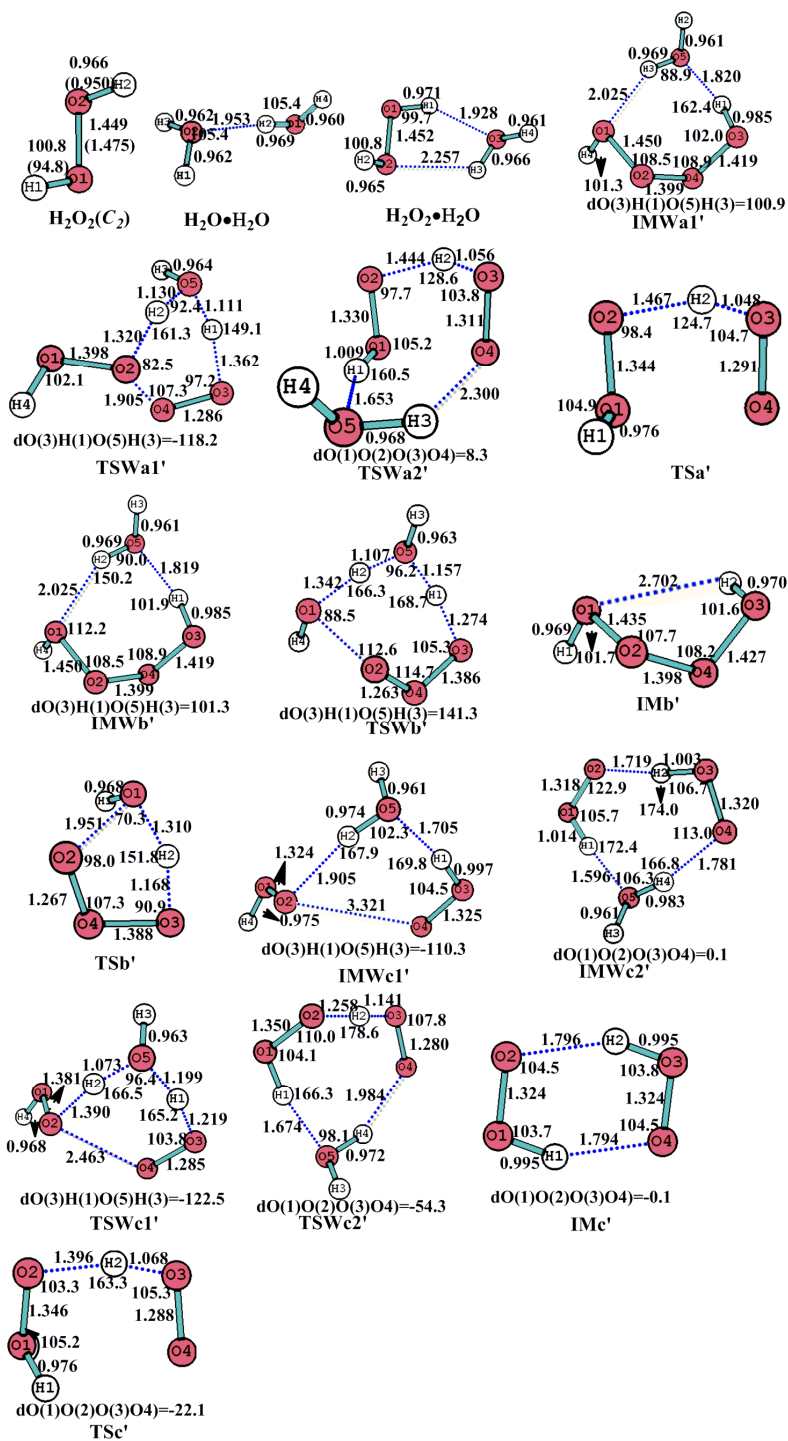

Fig. S4

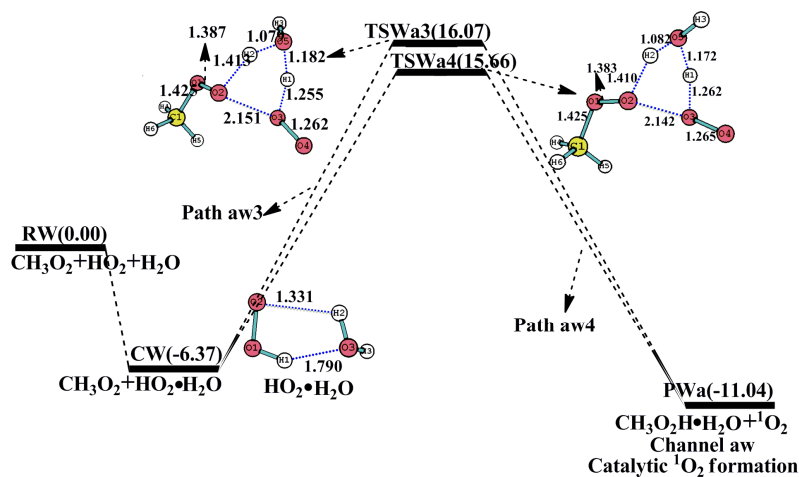

85

Fig. S5

There are two other pathways (Path aw3 and Path aw4) for water-catalyzed  $^1\text{O}_2$  formation in  $\text{CH}_3\text{O}_2 + \text{HO}_2$  reaction. The transition states of Path aw3 and Path aw4 have very high energy barrier (TSWa3 and TSWa4 are computed to lie 16.07 and 15.66 kcal·mol<sup>-1</sup> above the  $\text{CH}_3\text{O}_2 + \text{HO}_2 + \text{H}_2\text{O}$  reactants). Also the calculated results show the single water molecule in water-catalyzed Path aw3 and Path aw4 cannot reduce the reaction energy barrier because the energy barriers are 5.35 and 4.94 kcal·mol<sup>-1</sup> higher than that of the non-catalytic route of Path a in Fig 3, respectively. Hence, neither of the two pathways will be of any atmospheric relevance.

95



**Table S1.** T1 diagnostic values for the species that involved in the title reactions of  $\text{CH}_3\text{O}_2 + \text{HO}_2$  and  $\text{HO}_2 + \text{HO}_2$

| Species                                       | T1    | Species                                     | T1    | Species                                                | T1    |
|-----------------------------------------------|-------|---------------------------------------------|-------|--------------------------------------------------------|-------|
| $\text{CH}_3\text{O}_2$                       | 0.029 | $\text{HO}_2$                               | 0.031 | $\text{H}_2\text{O}$                                   | 0.010 |
| $\text{HO}_2\cdot\text{H}_2\text{O}$          | 0.027 | $\text{CH}_3\text{O}_2\text{H}$             | 0.013 | $\text{CH}_3\text{O}_2\text{H}\cdot\text{H}_2\text{O}$ | 0.013 |
| $^1\text{O}_2$                                | 0.015 | $\text{O}_3$                                | 0.027 | $\text{CH}_3\text{OH}$                                 | 0.010 |
| $\text{CH}_3\text{OH}\cdot\text{H}_2\text{O}$ | 0.011 | $^3\text{O}_2$                              | 0.018 | IMWa1                                                  | 0.018 |
| IMWa2                                         | 0.018 | TSWa1                                       | 0.031 | TSWa2                                                  | 0.031 |
| TSa                                           | 0.040 | IMWb1                                       | 0.017 | IMWb2                                                  | 0.018 |
| IMWb3                                         | 0.018 | TSWb1                                       | 0.032 | TSWb2                                                  | 0.032 |
| TSWb3                                         | 0.032 | IMb                                         | 0.018 | TSb                                                    | 0.039 |
| IMWc1                                         | 0.029 | IMWc2                                       | 0.017 | IMWc3                                                  | 0.029 |
| TSWc1                                         | 0.039 | TSWc2                                       | 0.031 | TSWc3                                                  | 0.034 |
| IMc                                           | 0.030 | TSc                                         | 0.036 | $\text{H}_2\text{O}_2$                                 | 0.013 |
| $\text{H}_2\text{O}_2\cdot\text{H}_2\text{O}$ | 0.013 | $\text{H}_2\text{O}\cdot\text{H}_2\text{O}$ | 0.011 | IMWa1'                                                 | 0.018 |
| TSWa1'                                        | 0.030 | TSWa2'                                      | 0.025 | TSa'                                                   | 0.035 |
| IMWb1'                                        | 0.018 | TSWb'                                       | 0.036 | IMb'                                                   | 0.019 |
| TSb'                                          | 0.039 | IMWc1'                                      | 0.028 | IMWc2'                                                 | 0.030 |
| TSWc1'                                        | 0.041 | TSWc2'                                      | 0.042 | IMc'                                                   | 0.033 |
| TSc'                                          | 0.040 |                                             |       |                                                        |       |

**Table S2.** The electronic energies( $E$ ), zero point energies(ZPE), total energies( $E_T$ ) and relative energies( $E_R$ ) of the reactants, intermediates, products and transition states for the reaction of  $\text{CH}_3\text{O}_2 + \text{HO}_2$  in presence and absence of a water molecule.

| Species                                                                 | $E^a/\text{a.u.}$ | $ZPE^b/\text{a.u.}$ | $E_T^c/\text{a.u.}$ | $E_R/(\text{kcal}\cdot\text{mol}^{-1})$ |
|-------------------------------------------------------------------------|-------------------|---------------------|---------------------|-----------------------------------------|
| RW( $\text{CH}_3\text{O}_2 + \text{HO}_2 + \text{H}_2\text{O}$ )        | -416.864269       | 0.078416            | -416.785853         | 0                                       |
| CW( $\text{HO}_2\cdot\text{H}_2\text{O} + \text{CH}_3\text{O}_2$ )      | -416.879268       | 0.083262            | -416.796006         | -6.37                                   |
| IMWa1                                                                   | -416.897527       | 0.085696            | -416.811831         | -16.30                                  |
| IMWa2                                                                   | -416.897502       | 0.085722            | -416.811780         | -16.27                                  |
| TSWa1                                                                   | -416.852023       | 0.081642            | -416.770381         | 9.71                                    |
| TSWa2                                                                   | -416.851028       | 0.081463            | -416.769565         | 10.22                                   |
| TSWa3                                                                   | -416.841498       | 0.081261            | -416.760237         | 16.07                                   |
| TSWa4                                                                   | -416.842118       | 0.081214            | -416.760904         | 15.66                                   |
| TSa + $\text{H}_2\text{O}$                                              | -416.848334       | 0.079559            | -416.768775         | 10.72                                   |
| PWa ( $\text{CH}_3\text{OOH}\cdot\text{H}_2\text{O} + {}^1\text{O}_2$ ) | -416.887321       | 0.083878            | -416.803443         | -11.04                                  |
| Pa ( $\text{CH}_3\text{OOH} + {}^1\text{O}_2$ ) + $\text{H}_2\text{O}$  | -416.874159       | 0.079751            | -416.794408         | -5.37                                   |
| IMWb1                                                                   | -416.901354       | 0.086786            | -416.814568         | -18.02                                  |
| IMWb2                                                                   | -416.901353       | 0.086791            | -416.814562         | -18.02                                  |
| IMWb3                                                                   | -416.902331       | 0.086934            | -416.815397         | -18.54                                  |
| TSWb1                                                                   | -416.863130       | 0.080864            | -416.782266         | 2.25                                    |
| TSWb2                                                                   | -416.863120       | 0.08087             | -416.782250         | 2.26                                    |
| TSWb3                                                                   | -416.864789       | 0.08105             | -416.783739         | 1.32                                    |
| IMb + $\text{H}_2\text{O}$                                              | -416.886706       | 0.082861            | -416.803845         | -11.29                                  |
| TSb + $\text{H}_2\text{O}$                                              | -416.845391       | 0.078095            | -416.767296         | 11.64                                   |
| PWb ( $\text{CH}_3\text{OH}\cdot\text{H}_2\text{O} + \text{O}_3$ )      | -416.899644       | 0.082766            | -416.816878         | -19.47                                  |
| Pb ( $\text{CH}_3\text{OH} + \text{O}_3$ ) + $\text{H}_2\text{O}$       | -416.891105       | 0.079882            | -416.811223         | -15.92                                  |
| IMWc1                                                                   | -416.891448       | 0.084421            | -416.807027         | -13.29                                  |
| IMWc2                                                                   | -416.891277       | 0.084337            | -416.806940         | -13.23                                  |
| IMWc3                                                                   | -416.889628       | 0.084335            | -416.805293         | -12.20                                  |
| TSWc1                                                                   | -416.856187       | 0.080116            | -416.776071         | 6.14                                    |
| TSWc2                                                                   | -416.855672       | 0.080048            | -416.775624         | 6.42                                    |
| TSWc3                                                                   | -416.827615       | 0.078976            | -416.748639         | 23.35                                   |
| IMc + $\text{H}_2\text{O}$                                              | -416.876189       | 0.08079             | -416.795399         | -5.99                                   |
| TSc + $\text{H}_2\text{O}$                                              | -416.867799       | 0.078383            | -416.789416         | -2.24                                   |
| PWc ( $\text{CH}_3\text{OOH}\cdot\text{H}_2\text{O} + {}^3\text{O}_2$ ) | -416.936281       | 0.083895            | -416.852386         | -41.75                                  |
| Pc ( $\text{CH}_3\text{OOH} + {}^3\text{O}_2$ ) + $\text{H}_2\text{O}$  | -416.923119       | 0.079768            | -416.843351         | -36.08                                  |

<sup>a</sup> The values obtained at the CCSD(T)/6-311++G(3d,2p)//B3LYP/6-311G(2d,2p) level of theory; <sup>b</sup> The values obtained at the B3LYP/6-311G(2d,2p) level of theory; <sup>c</sup> The values obtained at the CCSD(T)/6-311++G(3d,2p)//B3LYP/6-311G(2d,2p)+ZPE level of theory.

105 **Table S3(a).** The electronic energies ( $E$ ), zero point energies (ZPE), total energies ( $E_T$ ) and relative energies ( $E_R$ ) of the reactants, intermediates, products and transition states for the reaction of  $\text{HO}_2 + \text{HO}_2$  in presence and in absence of a water molecule.

| Species                                                           | $E^0$ /a.u. | $E^2$ /a.u.  | ZPE <sup>b</sup> /a.u. | $E_T^c$ /a.u. | $E_T^c$ /a.u. | $E_{R1}$ /(kcal.mol <sup>-1</sup> ) | $E_{R2}$ /(kcal.mol <sup>-1</sup> ) | $E_{R1}-E_{R2}$ |
|-------------------------------------------------------------------|-------------|--------------|------------------------|---------------|---------------|-------------------------------------|-------------------------------------|-----------------|
| RW' ( $\text{HO}_2 + \text{HO}_2 + \text{H}_2\text{O}$ )          | -377.647636 | -377.795585  | 0.049826               | -377.597810   | -377.745759   | 0                                   | 0                                   | 0               |
| CW' ( $\text{HO}_2 + \text{H}_2\text{O} + \text{HO}_2$ )          | -377.662636 | -377.8104189 | 0.054672               | -377.607964   | -377.755747   | -6.37                               | -6.27                               | -0.1            |
| IMWa1'                                                            | -377.686971 | -377.8380472 | 0.059091               | -377.627880   | -377.778956   | -18.87                              | -20.83                              | 1.96            |
| TSWa1'                                                            | -377.635931 | -377.785399  | 0.054062               | -377.581869   | -377.731337   | 10.00                               | 9.05                                | 0.95            |
| TSWa2'                                                            | -377.654075 | -377.803419  | 0.055556               | -377.598519   | -377.747863   | -0.44                               | -1.32                               | 0.88            |
| TSa' + H <sub>2</sub> O                                           | -377.634911 | -377.7839586 | 0.052203               | -377.582709   | -377.7317556  | 9.48                                | 8.79                                | 0.69            |
| PWa' ( $\text{H}_2\text{O}_2 + \text{H}_2\text{O} + \text{O}_2$ ) | -377.672607 | -377.8215576 | 0.055481               | -377.617126   | -377.7660766  | -12.12                              | -12.75                              | 0.63            |
| Pa' ( $\text{H}_2\text{O}_2 + \text{O}_2 + \text{H}_2\text{O}$ )  | -377.661298 | -377.8098472 | 0.051756               | -377.609542   | -377.7580912  | -7.36                               | -7.74                               | 0.38            |
| IMWb'                                                             | -377.686972 | -377.8380516 | 0.059085               | -377.627887   | -377.7789666  | -18.87                              | -20.84                              | 1.97            |
| TSWb'                                                             | -377.646431 | -377.7971899 | 0.053102               | -377.593329   | -377.7440879  | 2.81                                | 1.05                                | 1.76            |
| IMb' + H <sub>2</sub> O                                           | -377.671992 | -377.8230386 | 0.05514                | -377.616852   | -377.7678986  | -11.95                              | -13.89                              | 1.94            |
| TSb' + H <sub>2</sub> O                                           | -377.627862 | -377.7781149 | 0.050206               | -377.577656   | -377.7279089  | 12.65                               | 11.20                               | 1.45            |
| PWb' ( $\text{H}_2\text{O}_2 + \text{H}_2\text{O} + \text{O}_3$ ) | -377.697865 | -377.8447576 | 0.053648               | -377.644217   | -377.7911096  | -29.12                              | -28.46                              | -0.66           |
| Pb' ( $\text{H}_2\text{O} + \text{O}_3 + \text{H}_2\text{O}$ )    | -377.689408 | -377.8376903 | 0.05008                | -377.639328   | -377.7876103  | -26.05                              | -26.26                              | 0.21            |
| IMWc1'                                                            | -377.671306 | -377.8189263 | 0.056142               | -377.615164   | -377.7627843  | -10.89                              | -10.68                              | -0.21           |
| IMWc2'                                                            | -377.683757 | -377.8320857 | 0.059516               | -377.624241   | -377.7725697  | -16.59                              | -16.82                              | 0.23            |
| TSWc1'                                                            | -377.639375 | -377.7887755 | 0.052552               | -377.586823   | -377.7362235  | 6.89                                | 5.98                                | 0.91            |
| TSWc2'                                                            | -377.661777 | -377.8110335 | 0.052207               | -377.609570   | -377.7588265  | -7.38                               | -8.20                               | 0.82            |
| IMc' + H <sub>2</sub> O                                           | -377.667090 | -377.8152852 | 0.054038               | -377.613052   | -377.7612472  | -9.56                               | -9.72                               | 0.16            |
| TSc' + H <sub>2</sub> O                                           | -377.648250 | -377.7972322 | 0.049396               | -377.598854   | -377.7478362  | -0.66                               | -1.30                               | 0.64            |
| PWc' ( $\text{H}_2\text{O}_2 + \text{H}_2\text{O} + \text{O}_2$ ) | -377.721567 | -377.8692736 | 0.055498               | -377.666069   | -377.8137756  | -42.83                              | -42.68                              | -0.15           |
| Pc' ( $\text{H}_2\text{O}_2 + \text{O}_3 + \text{H}_2\text{O}$ )  | -377.710258 | -377.8575632 | 0.051773               | -377.658485   | -377.8057902  | -38.07                              | -37.67                              | -0.4            |

<sup>a1, a2</sup> The values obtained at the CCSD(T)/6-311++G(3d,2p)//B3LYP/6-311G(2d,2p) and CCSD(T)/aug-cc-pVTZ//B3LYP/6-311G(2d,2p) level of theory, respectively. <sup>b</sup>The values obtained at the B3LYP/6-311G(2d,2p) level of theory. <sup>c1, c2</sup> The values obtained at the CCSD(T)/6-311++G(3d,2p)//B3LYP/6-311G(2d,2p)+ZPE and CCSD(T)/aug-cc-pVTZ//B3LYP/6-311G(2d,2p)+ZPE level of theory, respectively. <sup>d</sup>  $E_{R1}$ ,  $E_{R2}$  relative energies ( $E_R$ ) of the reactants, intermediates, products and transition states for the  $\text{HO}_2 + \text{HO}_2$  reaction at the CCSD(T)/6-311++G(3d,2p)//B3LYP/6-311G(2d,2p)+ZPE level and CCSD(T)/aug-cc-pVTZ//B3LYP/6-311G(2d,2p)+ZPE level, respectively. <sup>e</sup>  $E_{R1}-E_{R2}$  the energy difference between CCSD(T)/6-311++G(3d,2p)//B3LYP/6-311G(2d,2p)+ZPE and CCSD(T)/aug-cc-pVTZ//B3LYP/6-311G(2d,2p).

**Table S3(b).** The relative energy ( $\Delta E$ , kcal-mol<sup>-1</sup>) of water-catalyzed transition states and intermediates to the corresponding ones without a water molecule in HO<sub>2</sub> + HO<sub>2</sub> reaction

| $\Delta E$                                                       | $\Delta E^a$ | $\Delta E^b$ | $\Delta E^a - \Delta E^b$ |
|------------------------------------------------------------------|--------------|--------------|---------------------------|
| $E_{(\text{TSa}^+ + \text{H}_2\text{O})} - E_{(\text{TSWa1}^')}$ | -0.52        | -0.26        | -0.26                     |
| $E_{(\text{TSWa2}^')} - E_{(\text{TSa}^+ + \text{H}_2\text{O})}$ | 9.92         | 10.01        | -0.09                     |
| $E_{(\text{IMWb}^')} - E_{(\text{IMb}^')}$                       | 6.92         | 6.95         | -0.03                     |
| $E_{(\text{TSWb}^')} - E_{(\text{TSb}^' + \text{H}_2\text{O})}$  | 9.84         | 10.15        | -0.31                     |
| $E_{(\text{IMc}^+ + \text{H}_2\text{O})} - E_{(\text{IMWc1}^')}$ | 1.33         | 0.96         | 0.37                      |
| $E_{(\text{IMc}^+ + \text{H}_2\text{O})} - E_{(\text{IMWc2}^')}$ | 7.03         | 7.10         | -0.07                     |
| $E_{(\text{TSc}^+ + \text{H}_2\text{O})} - E_{(\text{TSWc1}^')}$ | 7.55         | 7.28         | 0.27                      |
| $E_{(\text{TSc}^+ + \text{H}_2\text{O})} - E_{(\text{TSWc2}^')}$ | 6.72         | 6.90         | 0.18                      |

$\Delta E^a$ ,  $\Delta E^b$  The values obtained at the CCSD(T)/6-311++G(3d,2p)//B3LYP/6-311G(2d,2p) and  
 115 CCSD(T)/aug-cc-pVTZ//B3LYP/6-311G(2d,2p) level of theory, respectively;  $\Delta E^a - \Delta E^b$  denotes the  
 energy difference between  $\Delta E^a$  and  $\Delta E^b$ .

It can be seen from Table S3(a) that the relative energies to the reactants of  
 intermediates, products and transition states at CCSD(T)/aug-cc-pVTZ//B3LYP/6-  
 311G(2d,2p) level change by 0.10-1.97 kcal-mol<sup>-1</sup> than the corresponding values at  
 120 the CCSD(T)/6-311++G(3d,2p)//B3LYP/6-311G(2d,2p) level. Although the single  
 point energy at the aug-cc-pVTZ basis sets can give a more accurate energy, the  
 catalytic effect of water molecule at CCSD(T)/6-311++G(3d,2p)//B3LYP/6-311G  
 (2d,2p) level can be well characterized because, for the relative energy of water-  
 catalyzed transition states and intermediates to the corresponding ones without a  
 125 water molecule, the energy difference displayed in Table S3(b) between  
 CCSD(T)/aug-cc-pVTZ//B3LYP/6-311G(2d,2p) and CCSD(T)/6-311++G(3d,2p)//  
 B3LYP/6-311G(2d, 2p) level is range from 0.03 to 0.37 kcal-mol<sup>-1</sup>. From the  
 viewpoint of barrier height reducing and stabilization of intermediates enhancing,  
 the catalytic effect of water molecule at the different basis sets of 6-311G(2d,2p)  
 130 and aug-cc-pVTZ are in reasonable agreement with each other, revealing that the  
 basis sets effect are not significant. Besides, direct hydrogen abstraction process is  
 still the dominant pathway in Channel aw' and cw', respectively. Therefore, the  
 theoretical methods utilized herein are able to describe the reaction system reliably.

**Table S4** Vibrational frequencies (in  $\text{cm}^{-1}$ ) for the optimized geometries at B3LYP/6-311G(2d,2p) level of theory for the reaction of  $\text{CH}_3\text{O}_2 + \text{HO}_2$  in the presence and absence of a water molecule.

| Species                                        | Frequencies                                                                                                                                                           |
|------------------------------------------------|-----------------------------------------------------------------------------------------------------------------------------------------------------------------------|
| $\text{HO}_2^{\text{a}}$                       | 1173, 1449, 3623                                                                                                                                                      |
| $\text{HO}_2^{\text{b}}$                       | 1156, 1482, 3747                                                                                                                                                      |
| $\text{HO}_2^{\text{c}}$                       | 1232, 1479, 3727                                                                                                                                                      |
| $\text{HO}_2^{\text{d}}$                       | 1228, 1479, 3687                                                                                                                                                      |
| $\text{HO}_2^{\text{e}}$                       | 1266, 1527, 3825                                                                                                                                                      |
| Exp <sup>f</sup>                               | 1098, 1392, 3436                                                                                                                                                      |
| $\text{HO}_2\cdot\text{H}_2\text{O}$           | 112, 225, 258, 311, 507, 697, 1193, 1576, 1640, 3333, 3765, 3892                                                                                                      |
| $\text{CH}_3\text{O}_2$                        | 136, 495, 911, 1131, 1158, 1224, 1446, 1478, 1488, 3053, 3141, 3153                                                                                                   |
| $\text{H}_2\text{O}^{\text{a}}$                | 1666, 3810, 3905                                                                                                                                                      |
| $\text{H}_2\text{O}^{\text{b}}$                | 1709, 3887, 3984                                                                                                                                                      |
| $\text{H}_2\text{O}^{\text{c}}$                | 1685, 3875, 3988                                                                                                                                                      |
| $\text{H}_2\text{O}^{\text{d}}$                | 1673, 3876, 3975                                                                                                                                                      |
| $\text{H}_2\text{O}^{\text{e}}$                | 1700, 3983, 4082                                                                                                                                                      |
| Exp <sup>f</sup>                               | 1595, 3657, 3756                                                                                                                                                      |
| $^1\text{O}_2^{\text{a}}$                      | 1623                                                                                                                                                                  |
| $^1\text{O}_2^{\text{b}}$                      | 1573                                                                                                                                                                  |
| $^1\text{O}_2^{\text{c}}$                      | 1233                                                                                                                                                                  |
| $^1\text{O}_2^{\text{d}}$                      | 1693                                                                                                                                                                  |
| $^1\text{O}_2^{\text{e}}$                      | 1796                                                                                                                                                                  |
| Exp <sup>f</sup>                               | 1448                                                                                                                                                                  |
| $^3\text{O}_2^{\text{a}}$                      | 1638                                                                                                                                                                  |
| $^3\text{O}_2^{\text{b}}$                      | 1648                                                                                                                                                                  |
| $^3\text{O}_2^{\text{c}}$                      | 1423                                                                                                                                                                  |
| $^3\text{O}_2^{\text{d}}$                      | 1709                                                                                                                                                                  |
| $^3\text{O}_2^{\text{e}}$                      | 1808                                                                                                                                                                  |
| Exp <sup>f</sup>                               | 1580                                                                                                                                                                  |
| $\text{O}_3^{\text{a}}$                        | 745, 1216, 1260                                                                                                                                                       |
| $\text{O}_3^{\text{b}}$                        | 754, 1258, 1263                                                                                                                                                       |
| $\text{O}_3^{\text{c}}$                        | 736, 1162, 2282                                                                                                                                                       |
| $\text{O}_3^{\text{d}}$                        | 774, 1306, 1323                                                                                                                                                       |
| $\text{O}_3^{\text{e}}$                        | 812, 1408, 1424                                                                                                                                                       |
| Exp <sup>f</sup>                               | 705, 1042, 1110                                                                                                                                                       |
| $\text{CH}_3\text{OOH}$                        | 215, 251, 451, 884, 1035, 1172, 1208, 1385, 1452, 1463, 1514, 3011, 3073, 3110, 3771                                                                                  |
| $\text{CH}_3\text{OOH}\cdot\text{H}_2\text{O}$ | 57, 132, 188, 237, 240, 277, 451, 511, 628, 878, 1028, 1177, 1213, 1455, 1469, 1494, 1514, 1638, 3018, 3088, 3109, 3609, 3742, 3893                                   |
| $\text{CH}_3\text{OH}^{\text{a}}$              | 301, 1047, 1087, 1171, 1389, 1485, 1499, 1515, 2990, 3030, 3108, 3842                                                                                                 |
| $\text{CH}_3\text{OH}^{\text{b}}$              | 300, 1074, 1107, 1196, 1420, 1519, 1530, 1546, 3031, 3081, 3147, 3921                                                                                                 |
| $\text{CH}_3\text{OH}^{\text{c}}$              | 296, 1095, 1136, 1206, 1410, 1518, 1535, 1548, 3082, 3137, 3202, 4025                                                                                                 |
| $\text{CH}_3\text{OH}^{\text{d}}$              | 303, 1071, 1107, 1178, 1396, 1487, 1500, 1518, 3014, 3061, 3137, 3909                                                                                                 |
| $\text{CH}_3\text{OH}^{\text{e}}$              | 306, 1100, 1143, 1207, 1423, 1521, 1534, 1550, 3074, 3125, 3195, 4019                                                                                                 |
| Exp <sup>f</sup>                               | 200, 1033, 1060, 1165, 1345, 1455, 1477, 1477, 2844, 2960, 3000, 3681                                                                                                 |
| IMWa1                                          | 30, 52, 69, 100, 144, 209, 237, 281, 340, 416, 474, 601, 624, 817, 843, 923, 989, 1173, 1209, 1450, 1474, 1511, 1518, 1644, 3035, 3112, 3128, 3500, 3808, 3904        |
| IMWa2                                          | 32, 52, 76, 100, 143, 210, 238, 280, 339, 416, 474, 601, 624, 821, 842, 923, 990, 1173, 1209, 1450, 1474, 1511, 1517, 1644, 3035, 3112, 3128, 3500, 3810, 3905        |
| IMWa3                                          | 46, 98, 119, 134, 167, 210, 232, 269, 291, 424, 490, 531, 564, 932, 1030, 1129, 1157, 1209, 1228, 1450, 1473, 1497, 1555, 1637, 2962, 3040, 3119, 3139, 3701, 3878    |
| IMWa4                                          | 46, 79, 96, 126, 160, 209, 233, 258, 321, 466, 482, 522, 559, 933, 1033, 1124, 1157, 1208, 1217, 1450, 1473, 1496, 1600, 1641, 2927, 3040, 3119, 3140, 3734, 3870     |
| TSWa1                                          | 1210i, 91, 107, 135, 208, 257, 287, 408, 519, 555, 611, 641, 728, 935, 1040, 1169, 1215, 1248, 1341, 1451, 1468, 1473, 1507, 1607, 1726, 1999, 3035, 3110, 3133, 3835 |
| TSWa2                                          | 1252i, 93, 111, 133, 208, 256, 282, 404, 525, 570, 597, 629, 725, 939, 1040, 1169, 1211, 1255, 1307, 1454, 1472, 1479, 1506, 1617, 1676, 1972, 3034, 3108, 3134, 3850 |
| TSWa3                                          | 1200i, 79, 90, 112, 179, 200, 222, 385, 441, 551, 593, 636, 687, 930, 1041, 1141, 1165, 1212, 1325, 1452, 1471, 1503, 1589, 1625, 1667, 2263, 3030, 3102, 3129, 3846  |
| TSWa4                                          | 1191i, 75, 90, 107, 173, 185, 218, 387, 439, 563, 607, 618, 705, 942, 1038, 1163,                                                                                     |

|       |                                                                                                                                                                                                             |
|-------|-------------------------------------------------------------------------------------------------------------------------------------------------------------------------------------------------------------|
| TSa   | 1181, 1217, 1310, 1449, 1463, 1470, 1502, 1638, 1756, 2253, 3029, 3100, 3130, 3842<br>532i, 72, 97, 109, 197, 212, 470, 510, 928, 1056, 1144, 1203, 1255, 1450, 1475, 1488,<br>1493, 3031, 3099, 3108, 3143 |
| IMWb1 | 78, 91, 140, 160, 215, 248, 276, 317, 365, 533, 562, 590, 610, 813, 859, 939, 988,<br>1176, 1207, 1453, 1475, 1511, 1541, 1652, 3033, 3113, 3120, 3442, 3702, 3886                                          |
| IMWb2 | 79, 140, 161, 215, 248, 276, 317, 365, 533, 562, 590, 610, 813, 859, 939, 988, 1178,<br>1207, 1453, 1475, 1511, 1542, 1652, 3033, 3113, 3120, 3441, 3701, 3886                                              |
| IMWb3 | 76, 93, 142, 164, 213, 247, 282, 357, 375, 543, 567, 589, 612, 807, 852, 937, 985,<br>1176, 1208, 1453, 1475, 1510, 1554, 1641, 3037, 3120, 3123, 3452, 3687, 3882                                          |
| TSWb1 | 1327i, 94, 151, 207, 228, 288, 381, 510, 518, 557, 593, 672, 742, 942, 1050, 1138,<br>1165, 1192, 1268, 1377, 1453, 1481, 1486, 1589, 1686, 1889, 2910, 2996, 3076, 3855                                    |
| TSWb2 | 1324i, 95, 152, 209, 228, 288, 382, 511, 518, 557, 593, 672, 742, 943, 1050, 1139,<br>1165, 1192, 1268, 1377, 1453, 1481, 1486, 1590, 1687, 1889, 2909, 2995, 3074, 3853                                    |
| TSWb3 | 97, 142, 208, 235, 289, 382, 516, 523, 561, 583, 688, 695, 941, 1050, 1140, 1161,<br>1195, 1327, 1427, 1451, 1481, 1496, 1570, 1693, 1885, 2910, 3005, 3077, 3850                                           |
| IMb   | 52, 126, 157, 355, 383, 471, 598, 614, 638, 830, 932, 1009, 1041, 1157, 1297, 1413,<br>1418, 1481, 3059, 3129, 3737                                                                                         |
| TSb   | 1496i, 148, 206, 242, 319, 529, 619, 761, 920, 1032, 1121, 1148, 1183, 1372, 1438,<br>1471, 1487, 1890, 2935, 2986, 3092                                                                                    |
| IMWc1 | 6, 12, 25, 47, 62, 72, 103, 120, 134, 227, 280, 413, 510, 696, 910, 1132, 1167, 1193,<br>1236, 1448, 1477, 1485, 1541, 1657, 3061, 3153, 3168, 3332, 3785, 3905                                             |
| IMWc2 | 31, 47, 57, 65, 69, 128, 147, 187, 253, 281, 405, 508, 671, 779, 906, 1130, 1165,<br>1206, 1238, 1443, 1472, 1490, 1598, 1662, 3060, 3157, 3164, 3209, 3613, 3880                                           |
| IMWc3 | 28, 48, 60, 70, 76, 131, 151, 189, 265, 282, 417, 508, 644, 798, 907, 1130, 1165,<br>1206, 1237, 1444, 1472, 1489, 1597, 1671, 3060, 3155, 3164, 3207, 3607, 3879                                           |
| IMWc4 | 6, 10, 39, 60, 70, 80, 132, 162, 286, 342, 459, 508, 626, 839, 908, 1132, 1165, 1197,<br>1233, 1448, 1477, 1486, 1606, 1671, 3060, 3151, 3166, 3210, 3628, 3867                                             |
| TSWc1 | 587i, 12, 18, 61, 65, 87, 98, 112, 169, 217, 335, 346, 487, 814, 918, 976, 1135, 1190,<br>1254, 1447, 1475, 1483, 1582, 1649, 1717, 3054, 3141, 3160, 3804, 3911                                            |
| TSWc2 | 1562i, 55, 89, 92, 145, 158, 228, 257, 405, 521, 614, 636, 715, 946, 1071, 1153, 1165,<br>1213, 1299, 1385, 1452, 1473, 1499, 1705, 1771, 1982, 3037, 3114, 3138, 3850,                                     |
| TSWc3 | 1575i, 55, 87, 93, 147, 157, 226, 255, 404, 521, 603, 633, 688, 947, 1074, 1156, 1203,<br>1228, 1299, 1406, 1451, 1473, 1498, 1684, 1750, 1960, 3037, 3113, 3139, 3849                                      |
| TSWc4 | 1756i, 14, 24, 49, 99, 128, 172, 190, 373, 454, 560, 660, 721, 942, 1109, 1148, 1173,<br>1219, 1325, 1429, 1451, 1472, 1493, 1630, 1718, 1973, 3037, 3114, 3144, 3845                                       |
| IMc   | 21, 41, 61, 113, 130, 209, 506, 634, 909, 1132, 1167, 1189, 1235, 1448, 1477, 1485,<br>1542, 3060, 3151, 3166, 3407                                                                                         |
| TSc   | 297i, 67, 91, 106, 165, 321, 490, 785, 916, 1025, 1134, 1195, 1251, 1447, 1476, 1484,<br>1619, 2094, 3055, 3142, 3160                                                                                       |

<sup>a</sup> The values obtained at the B3LYP/6-311G(2d,2p) level of theory; <sup>b</sup> The values obtained at the CCSD/6-311G(2d,2p) level of theory; <sup>c</sup> The values obtained at the MP2/6-311G(2d,2p) level of theory; <sup>d</sup> The values obtained at the MPW1PW91/6-311G(2d,2p) level of theory; <sup>e</sup> The values obtained at the MPW1K/6-311G(2d,2p) level of theory; <sup>f</sup> the experimental values that taken from the NIST Chemistry Webbook, <http://cccbdb.nist.gov/cccbdbindex.asp>

The harmonic vibrational frequencies ( $\text{cm}^{-1}$ ) of the reactants, intermediates, transition states and products for the reaction of  $\text{CH}_3\text{O}_2 + \text{HO}_2$  in the presence and absence of a water molecule at the B3LYP/6-311G(2d,2p) level of theory along with the available experimental data are listed in Table S3. For the species ( $\text{HO}_2$ ,  $\text{H}_2\text{O}$ ,  $^{145} \text{O}_2$ ,  $\text{O}_3$  and  $\text{CH}_3\text{OH}$ ), the average absolute deviation between the calculated harmonic vibrational frequencies at the B3LYP/6-311G(2d,2p), CCSD/6-311G(2d,2p), MP2/6-311G(2d,2p), MPW1PW91/6-311G(2d,2p) and MPW1K/6-311G(2d,2p) levels of theory and the corresponding experimental ones are 6.97%, 8.53%, 11.06%, 9.25% and 12.91%, respectively. This further indicates that the calculated data for <sup>150</sup> the title reaction at the B3LYP/6-311G(2d,2p) level of theory is acceptable.

**Table S5** Vibrational frequencies (in  $\text{cm}^{-1}$ ) for the optimized geometries at B3LYP/6-311G(2d,2p) level of theory for the reaction of  $\text{HO}_2 + \text{HO}_2$  in the presence and absence of a water molecule.

| Species                                       | Frequencies                                                                                                        |
|-----------------------------------------------|--------------------------------------------------------------------------------------------------------------------|
| $\text{H}_2\text{O}\cdot\text{H}_2\text{O}$   | 139, 161, 163, 196, 388, 652, 1639, 1660, 3703, 3816, 3899, 3914                                                   |
| $\text{H}_2\text{O}_2\cdot\text{H}_2\text{O}$ | 110, 199, 215, 228, 317, 472, 653, 938, 1356, 1529, 1643, 3598, 3774, 3789, 3900                                   |
| IMWa1'                                        | 96, 137, 176, 240, 263, 359, 417, 473, 562, 596, 633, 814, 864, 947, 1374, 1560, 1640, 3438, 3718, 3748, 3884      |
| IMWa2'                                        | 110, 139, 184, 239, 305, 327, 376, 444, 512, 580, 616, 1047, 1114, 1231, 1436, 1598, 1648, 3052, 3645, 3649, 3674  |
| TSWa1'                                        | 1147i, 138, 163, 249, 293, 378, 527, 561, 581, 631, 726, 997, 1252, 1350, 1418, 1475, 1615, 1749, 2029, 3766, 3831 |
| TSWa2'                                        | 651i, 82, 102, 202, 227, 269, 337, 441, 458, 497, 594, 1033, 1108, 1214, 1525, 1583, 1640, 2408, 3043, 3746, 3877  |
| TSA'                                          | 682i, 220, 296, 447, 522, 618, 1060, 1248, 1420, 1549, 2520, 3634                                                  |
| IMWb'                                         | 96, 137, 176, 240, 262, 358, 416, 473, 562, 595, 633, 814, 863, 947, 1374, 1561, 1640, 3437, 3718, 3748, 3884      |
| TSWb'                                         | 1206i, 94, 229, 333, 435, 489, 542, 570, 608, 685, 739, 786, 971, 1164, 1289, 1432, 1661, 1695, 1934, 3808, 3846   |
| IMb'                                          | 176, 373, 395, 509, 625, 650, 869, 940, 1394, 1416, 3735, 3741                                                     |
| TSb'                                          | 1456i, 347, 456, 538, 621, 763, 792, 934, 1153, 1351, 1915, 3787                                                   |
| IMWc1'                                        | 23, 34, 40, 75, 132, 183, 259, 272, 296, 414, 660, 789, 1174, 1198, 1460, 1603, 1667, 3220, 3628, 3634, 3881       |
| IMWc2'                                        | 70, 82, 153, 188, 232, 281, 305, 354, 489, 724, 818, 910, 1222, 1234, 1611, 1644, 1688, 2924, 3156, 3456, 3876     |
| TSWc1'                                        | 1477i, 76, 120, 148, 209, 276, 378, 505, 566, 637, 706, 1032, 1142, 1300, 1377, 1414, 1705, 1790, 2096, 3744, 3848 |
| TSWc2'                                        | 1669i, 51, 126, 143, 184, 272, 287, 322, 368, 604, 607, 889, 1105, 1170, 1345, 1550, 1587, 1648, 3118, 3666, 3875  |
| IMc'                                          | 111, 218, 274, 296, 609, 726, 1199, 1208, 1566, 1591, 3224, 3316                                                   |
| TSc'                                          | 787i, 122, 157, 260, 358, 857, 957, 1240, 1458, 1502, 1758, 3632                                                   |

**Table S6** The calculated CVT/SCT rate constants for Path a and Path c' along with the available experimental and theoretical values.

| T(K) | $k_a$    |                        | $k_{c'}$ | Exp <sup>b</sup>      | Exp <sup>c</sup>      |
|------|----------|------------------------|----------|-----------------------|-----------------------|
| 225  | 2.30E-15 | 3.42 E-16 <sup>a</sup> | 5.08E-11 | 7.36E-11 <sup>b</sup> |                       |
| 250  | 2.18E-15 | 1.51E-16 <sup>a</sup>  | 1.30E-11 | 7.26E-12 <sup>b</sup> | 2.77E-12 <sup>c</sup> |
| 275  | 1.20E-15 | 8.31E-17 <sup>a</sup>  | 4.55E-12 | 4.21E-12 <sup>b</sup> | 2.17E-12 <sup>c</sup> |
| 295  | 9.05E-16 |                        | 2.32E-12 |                       |                       |
| 298  | 6.18E-16 |                        | 2.12E-12 |                       |                       |
| 300  | 5.19E-16 | 5.41E-17 <sup>a</sup>  | 2.00E-12 | 2.67E-12 <sup>b</sup> | 1.77E-12 <sup>c</sup> |
| 309  | 5.04E-16 |                        | 1.55E-12 | 2.31E-12 <sup>b</sup> |                       |
| 325  | 4.83E-16 | 4.01 E-17 <sup>a</sup> | 1.03E-12 |                       | 1.49E-12 <sup>c</sup> |
| 350  | 4.77E-16 | 3.29 E-17 <sup>a</sup> | 6.01E-13 |                       | 1.29E-12 <sup>c</sup> |
| 375  | 3.76E-16 | 2.92 E-17 <sup>a</sup> | 3.85E-13 |                       |                       |
| 420  | 3.70E-16 |                        | 2.05E-13 |                       |                       |
| 600  | 3.57E-16 |                        | 9.57E-14 |                       |                       |
| 800  | 2.96E-16 |                        | 5.36E-14 |                       |                       |
| 1000 | 2.80E-16 |                        | 3.07E-14 |                       |                       |
| 1200 | 2.46E-16 |                        | 2.71E-14 |                       |                       |
| 1400 | 1.97E-16 |                        | 2.53E-14 |                       |                       |

<sup>155</sup> <sup>a</sup> the calculated rate constant of <sup>1</sup>O<sub>2</sub> formation in CH<sub>3</sub>O<sub>2</sub> + HO<sub>2</sub> reaction by Anglada et al [J. M. Anglada, S. Olivella and A. Sole, *J. Phys. Chem. A.*, 2006, **110**, 6073-6082.]; <sup>b</sup> the experimental values of <sup>3</sup>O<sub>2</sub> formation in HO<sub>2</sub> + HO<sub>2</sub> reaction by Stone et al [D. Stone and D. M. Rowley, *Phys. Chem. Chem. Phys.*, 2005, **7**, 2156-2163]; <sup>c</sup> the experimental values of <sup>3</sup>O<sub>2</sub> formation in HO<sub>2</sub> + HO<sub>2</sub> reaction by Kanno et al [N. Kanno, K. Tonokura and M. Koshi, *J. Geophys. Res.*, 2006, **111**, 7.]
